# Supplementary material for: Bi2WO6/C-Dots/TiO2: A Novel Z-Scheme Photocatalyst for the Degradation of Fluoroquinolone Levofloxacin from Aqueous Medium
Source: MDPI journal article supplement (doi:10.3390/nano10050910), 2020-05-08
Supplement: s1 [file s1]

Article

# **Bi<sub>2</sub>WO<sub>6</sub>/C-Dots/TiO<sub>2</sub>: A Novel Z-Scheme Photocatalyst for the Degradation of Fluoroquinolone Levofloxacin from Aqueous Medium**

Shelja Sharma <sup>1</sup>, Alex O. Ibhaddon <sup>2</sup>, M. Grazia Francesconi <sup>3</sup>, Surinder Kumar Mehta <sup>4</sup>, Sasikumar Elumalai <sup>1</sup>, Sushil Kumar Kansal <sup>5,\*</sup>, Ahmad Umar <sup>6,\*</sup> and S. Baskoutas <sup>7</sup>

<sup>1</sup> Chemical Engineering Division, Centre of Innovative and Applied Bioprocessing, Mohali-140306, India; [sshhelja@yahoo.in](mailto:sshhelja@yahoo.in) (S.S.); [sasikumar@ciab.res.in](mailto:sasikumar@ciab.res.in) (S.E.)

<sup>2</sup> Department of Chemical Engineering, The University of Hull, Hull HU6 7RX, United Kingdom; [a.o.ibhaddon@hull.ac.uk](mailto:a.o.ibhaddon@hull.ac.uk)

<sup>3</sup> Department of Chemistry, University of Hull, Hull HU6 7RX, United Kingdom; [m.g.francesconi@hull.ac.uk](mailto:m.g.francesconi@hull.ac.uk)

<sup>4</sup> Department of Chemistry and Centre of Advanced Studies, Panjab University, Chandigarh 160014, India; [skmehta@pu.ac.in](mailto:skmehta@pu.ac.in)

<sup>5</sup> Dr. S.S. Bhatnagar University Institute of Chemical Engineering and Technology, Panjab University, Chandigarh 160014, India

<sup>6</sup> Department of Chemistry, Faculty of Science and Arts, Promising Centre for Sensors and Electronic Devices (PCSED), Najran University, Najran-11001, Kingdom of Saudi Arabia

<sup>7</sup> Department of Materials Science, University of Patras, Patras-26504, Rio Achaia, Greece; [bask@upatras.gr](mailto:bask@upatras.gr)

\* Correspondence: [sushilkk1@pu.ac.in](mailto:sushilkk1@pu.ac.in) (S.K.K.); [ahmadumar786@gmail.com](mailto:ahmadumar786@gmail.com) (A.U.)

## **SUPPORTING INFORMATION**

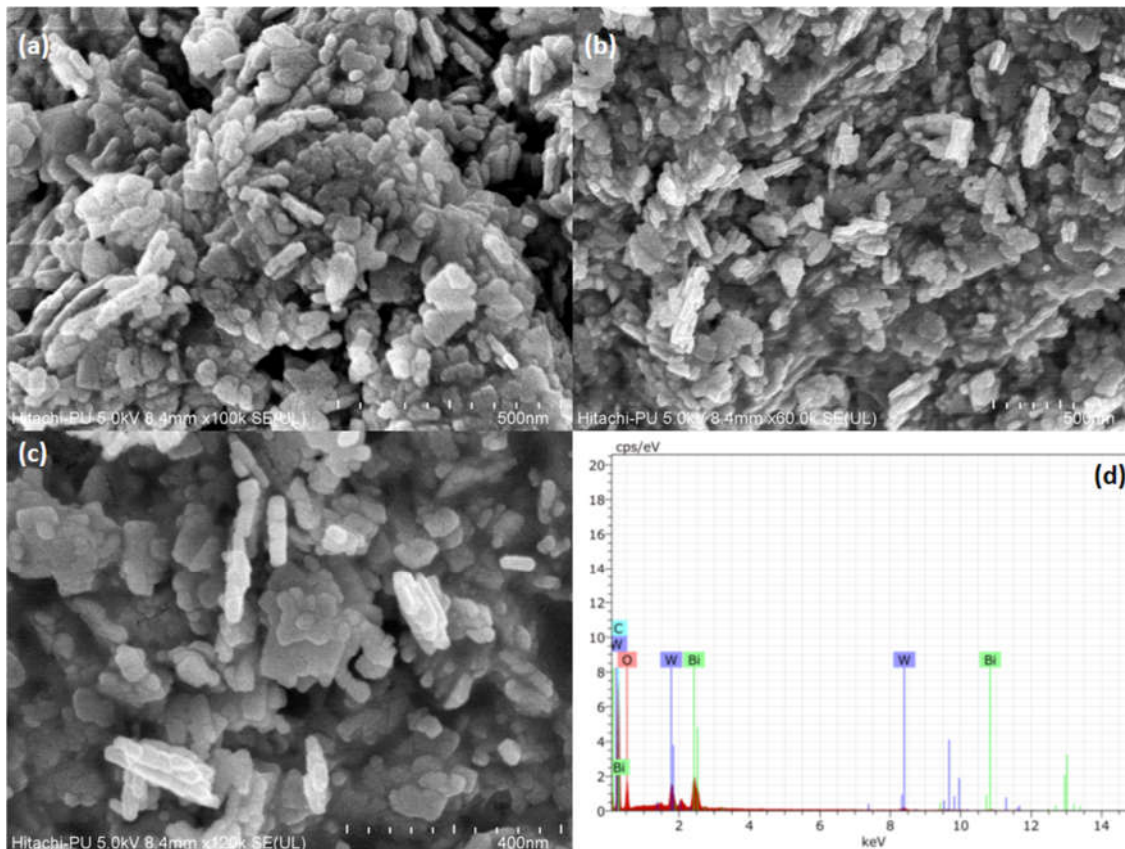

**Figure S1.** (a,b,c) FESEM images of Bi<sub>2</sub>WO<sub>6</sub> at different magnifications. (d) EDS spectrum of Bi<sub>2</sub>WO<sub>6</sub>.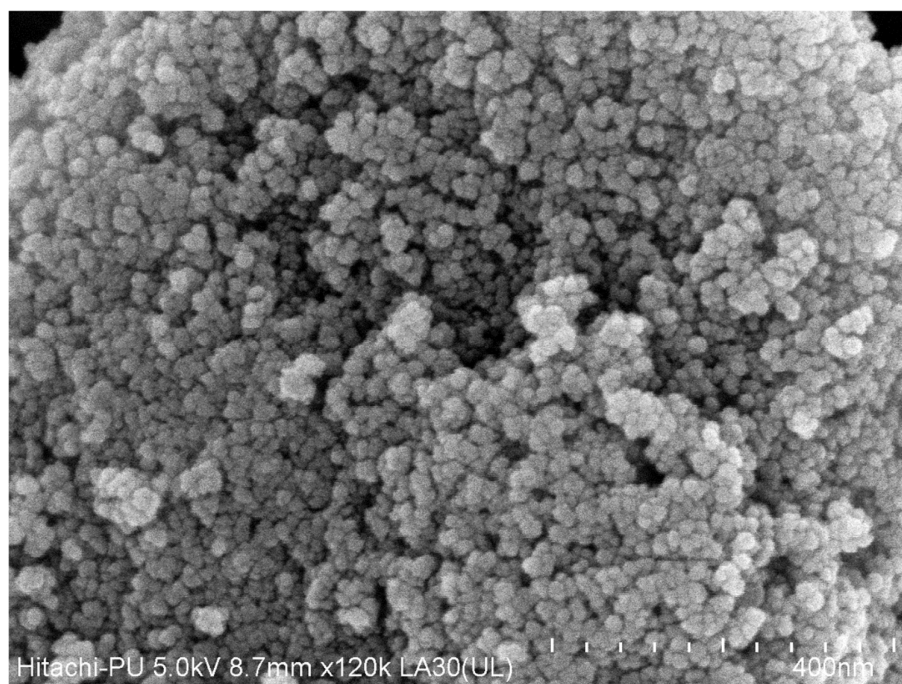**Figure S2.** FESEM image of TiO<sub>2</sub>/C-dots.**Table S1.** Elemental composition of Bi<sub>2</sub>WO<sub>6</sub>.

| Element  | Series   | unn. C [wt.%] | norm. C [wt.%] | Atom. C [wt.%] | Error (3 Sigma) [wt.%] |
|----------|----------|---------------|----------------|----------------|------------------------|
| Oxygen   | K-Series | 14.21         | 12.75          | 17.69          | 6.67                   |
| Bismuth  | M-Series | 20.11         | 18.05          | 1.92           | 2.26                   |
| Tungsten | L-Series | 30.60         | 27.47          | 3.32           | 4.25                   |
| Carbon   | K-Series | 46.48         | 41.72          | 77.08          | 17.70                  |
| Total    |          | 111.40        | 100.00         | 100.00         |                        |

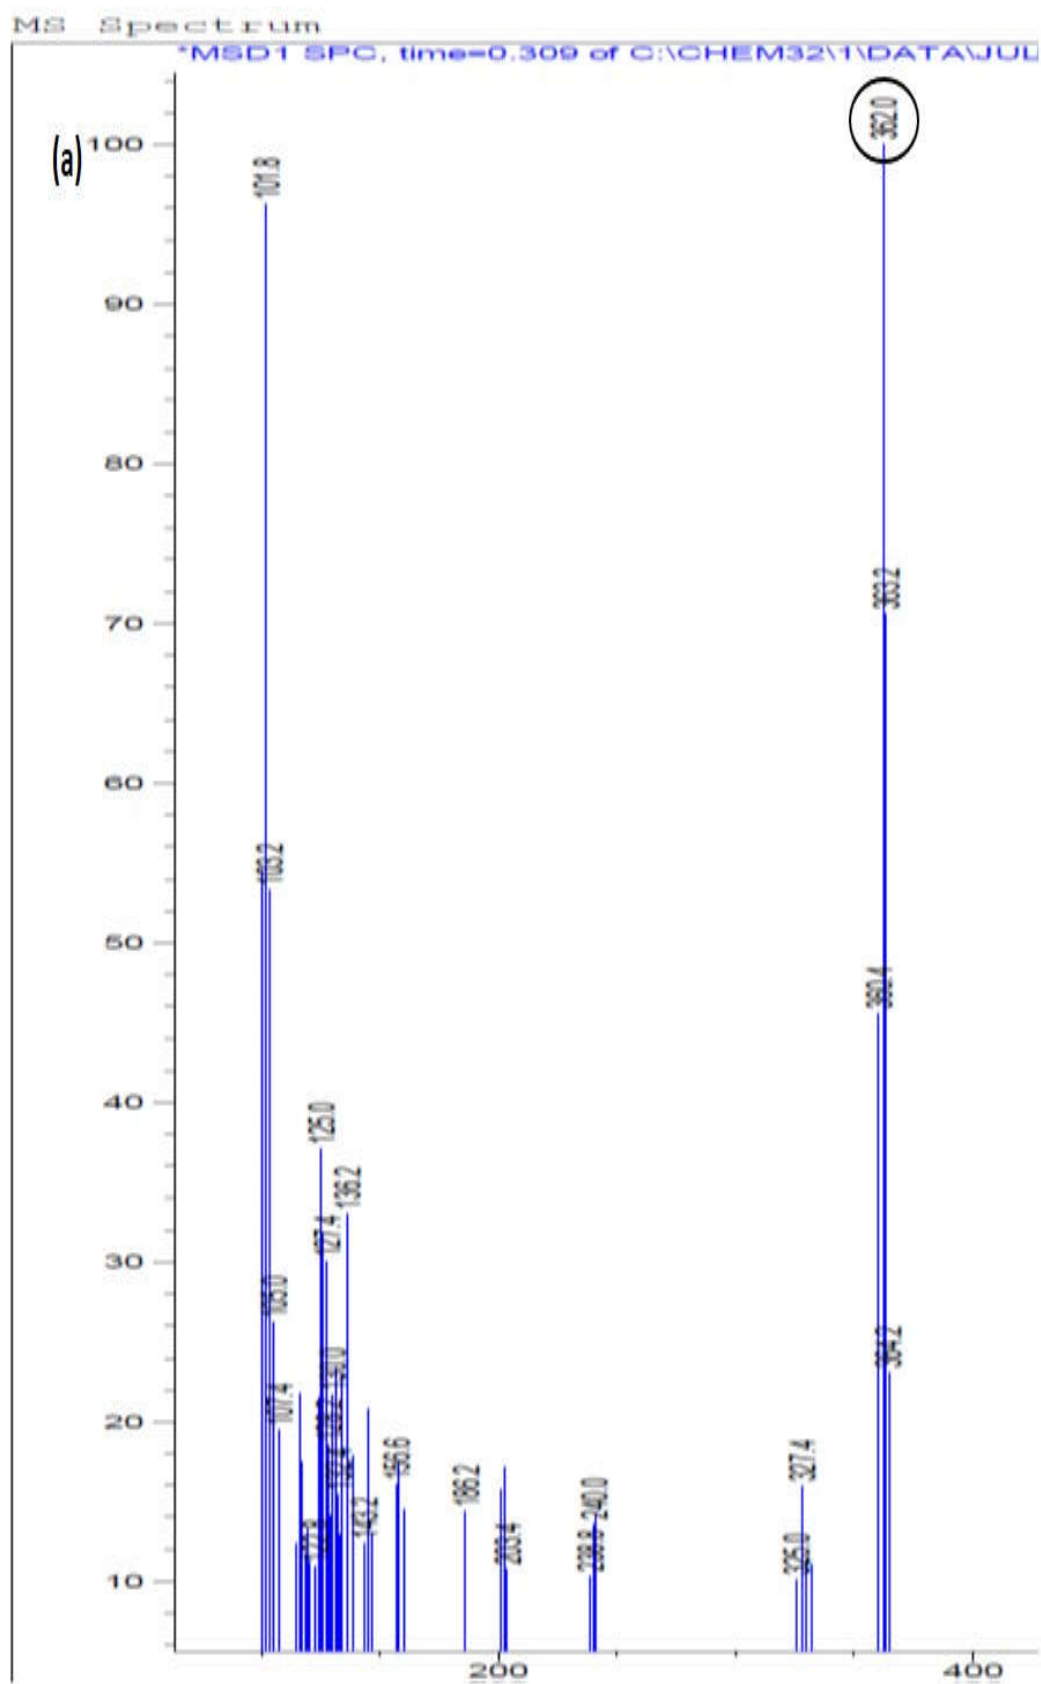

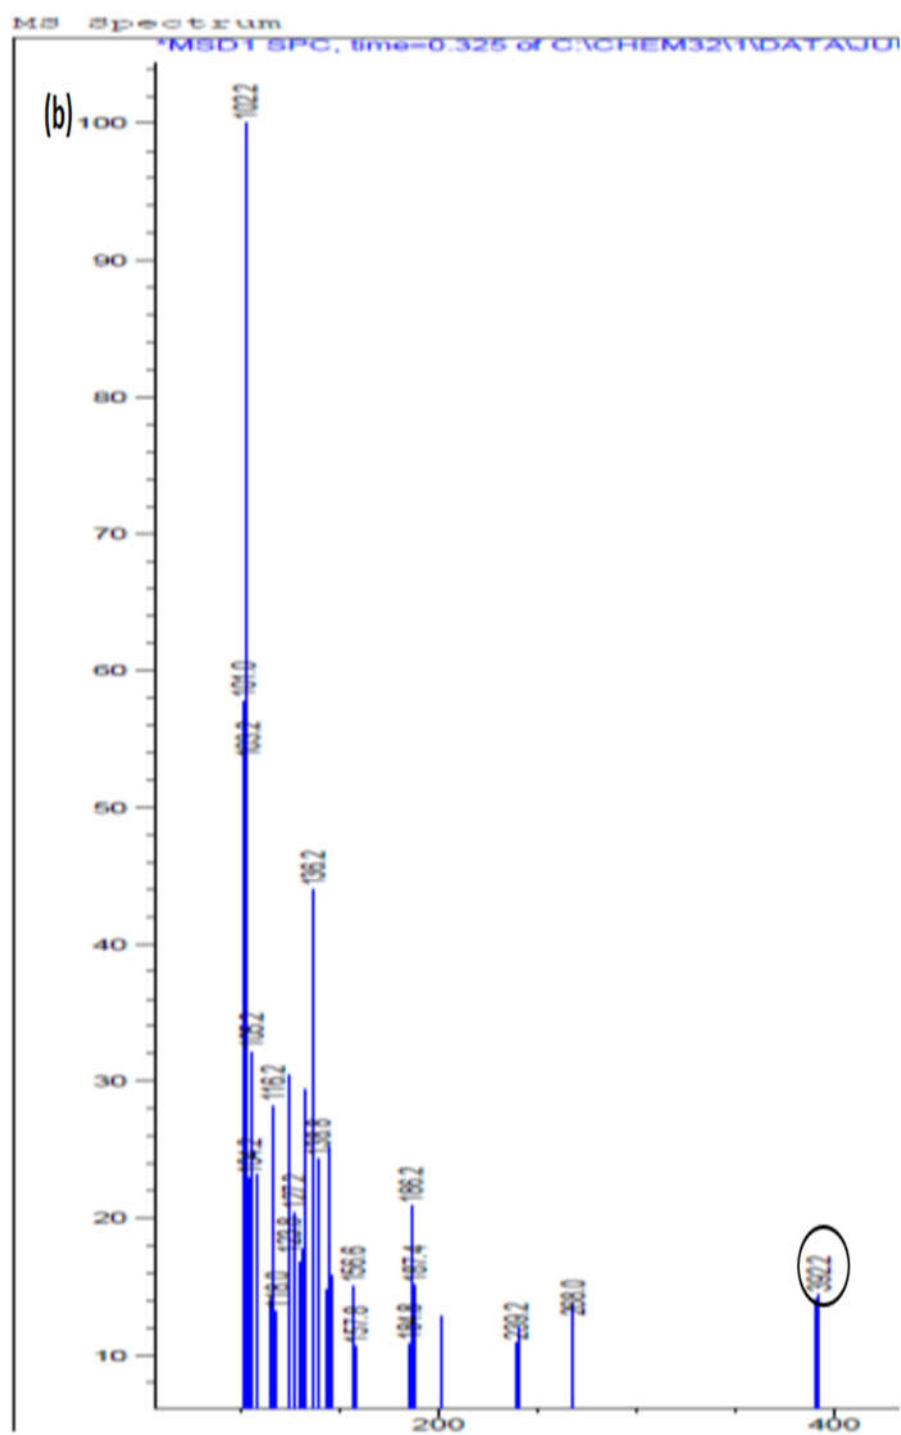

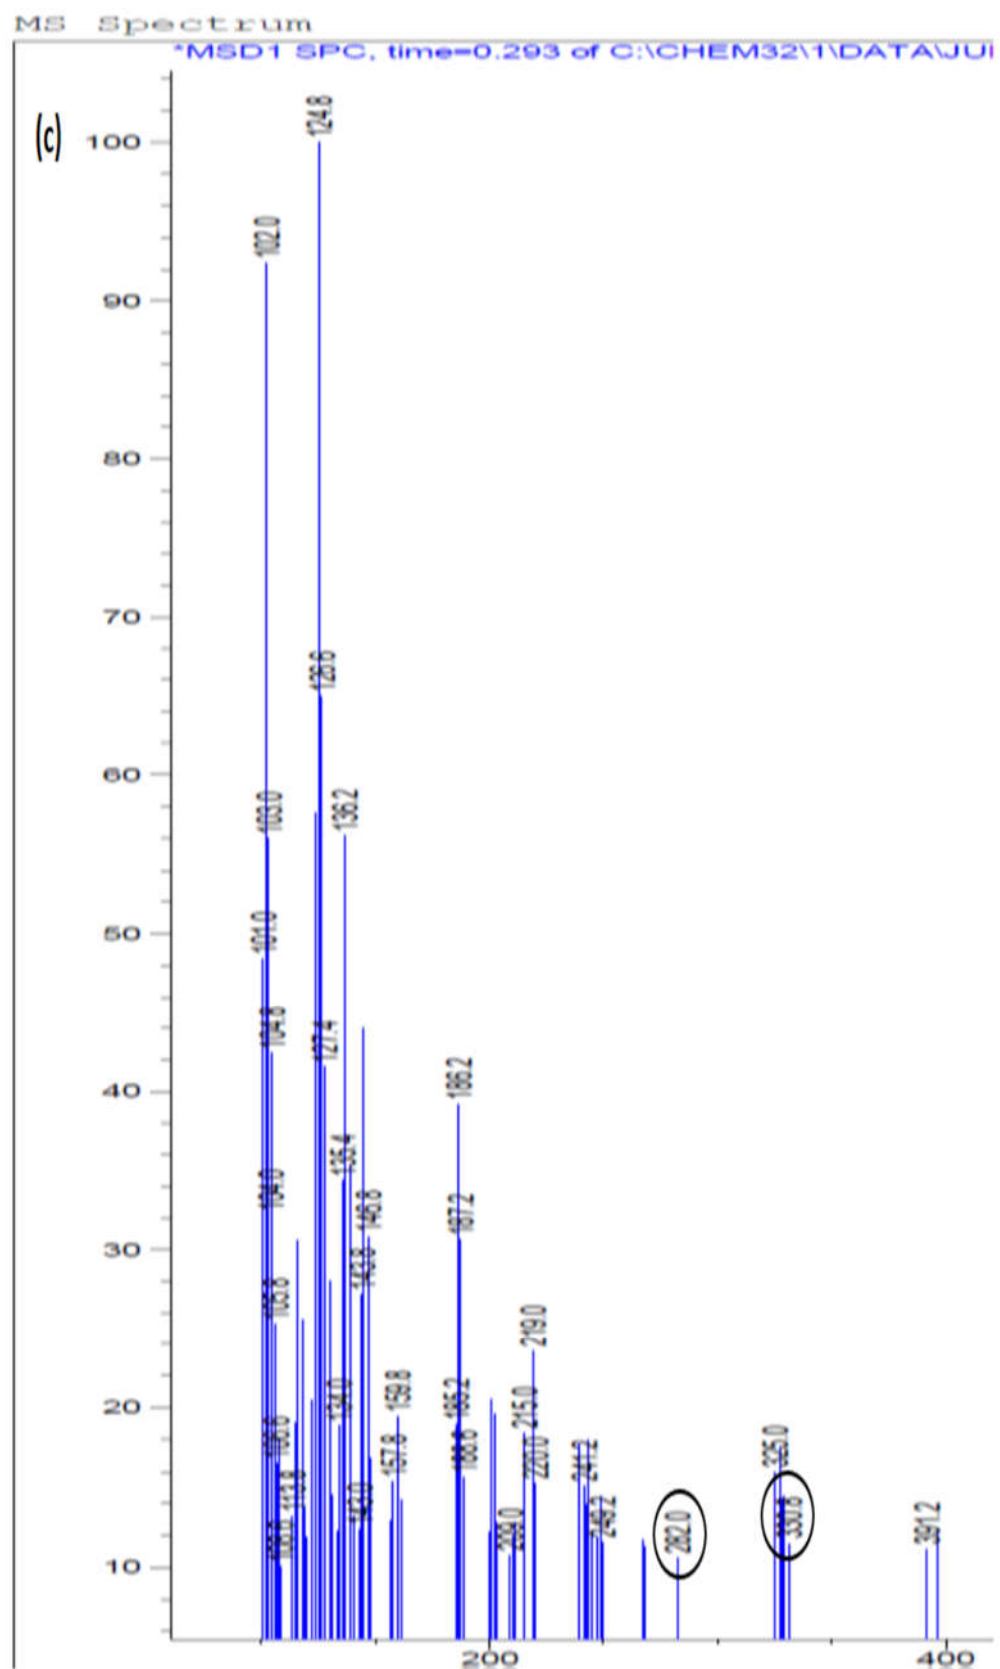

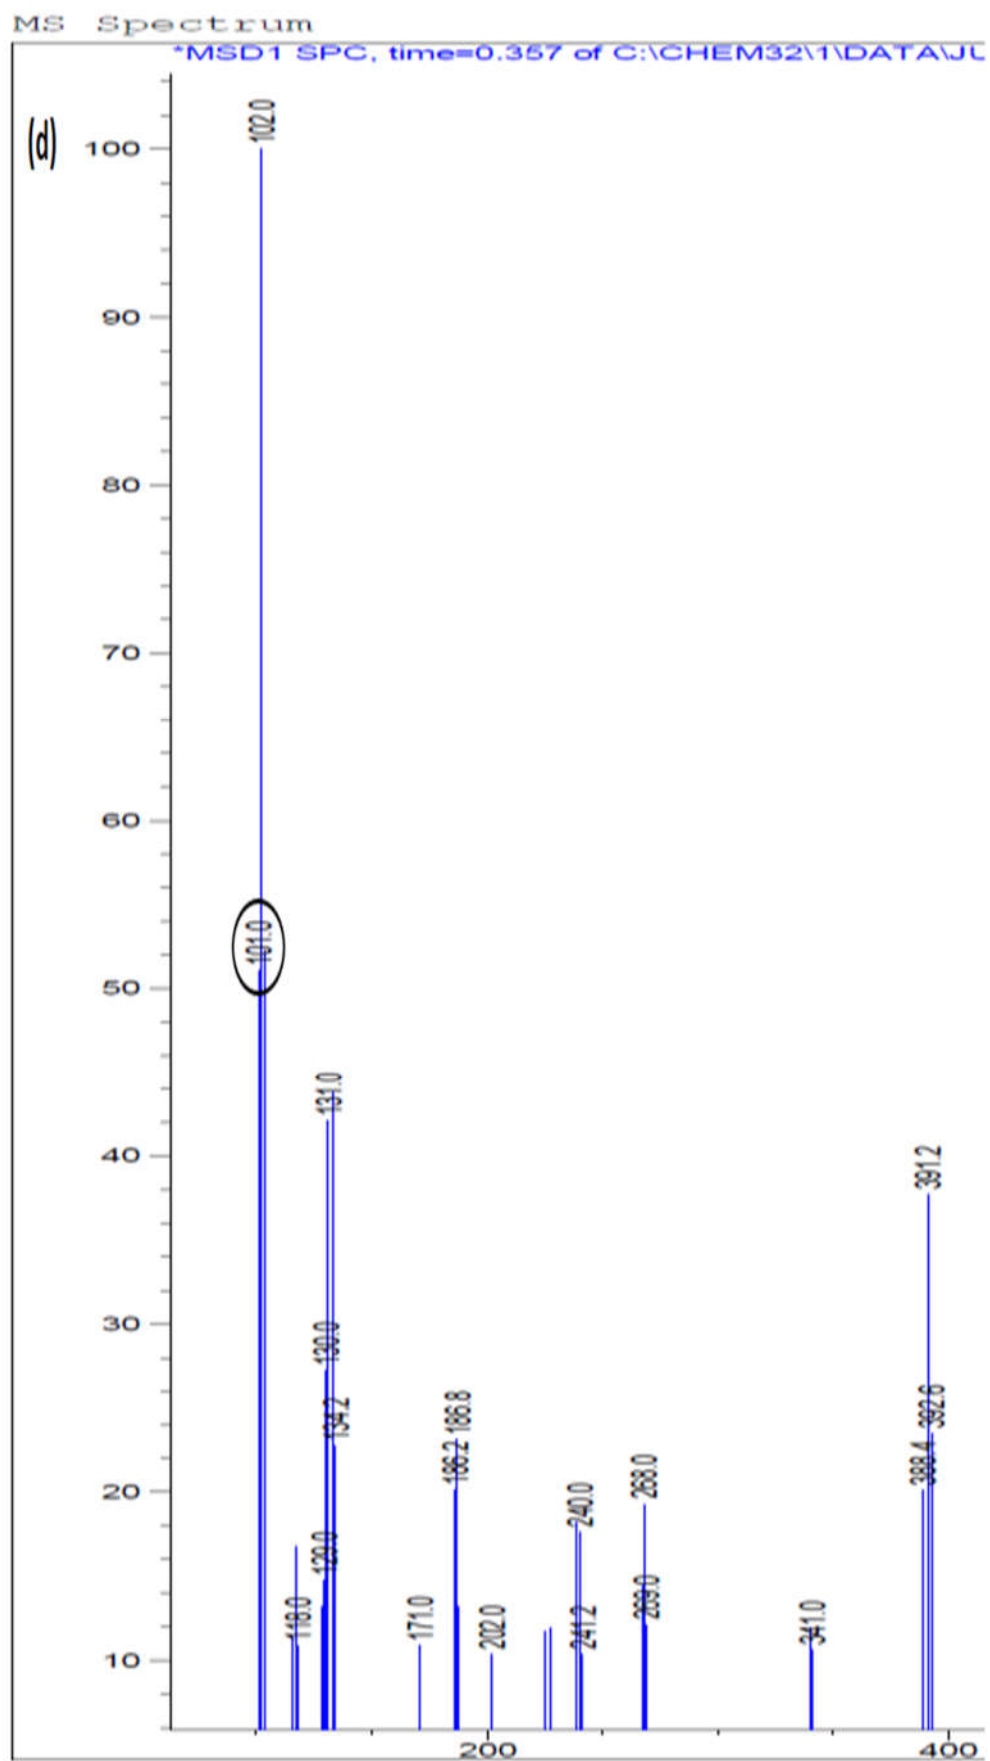

**Figure S3.** MS spectrum of  $[M+H]^+$  ions of levofloxacin (a) parent compound; (b-d) its main products formed during the solar light induced photocatalytic degradation.
